# Supplementary material for: Influenza A penetrates host mucus by cleaving sialic acids with neuraminidase
Source: PubMed Central journal article supplement (PMC3842836; doi:10.1186/1743-422x-10-321), 2013-11-22
Supplement: 1743-422X-10-321-S2.pdf [file 1743-422X-10-321-S2.pdf]

Additional file 2: Results of 3-way ANOVA analysis of the data in Figure 3, corrected for multiple comparisons using Tukey's HSD.

| PAIRWISE COMPARISONS            | Virus       |           | A/SD/1/2009(SOIV) |           | A/SD/17/2008(H1N1) |           | A/Aichi/2/68(H3N2) |           |
|---------------------------------|-------------|-----------|-------------------|-----------|--------------------|-----------|--------------------|-----------|
|                                 | t           | P         | t                 | P         | t                  | P         | t                  | P         |
| [PSM_0_No]vs[PSM_0_Yes]         | t(4)=2.62   | p< 0.0589 | t(4)=6.29         | p< 0.0033 | t(4)=2.47          | p< 0.0689 | t(4)=0.41          | p< 0.7042 |
| [PSM_0_No]vs[PSM_1500_No]       | t(4)=0.21   | p< 0.8468 | t(4)=0.42         | p< 0.6951 | t(4)=3.45          | p< 0.0261 | t(4)=0.22          | p< 0.8396 |
| [PSM_0_No]vs[PSM_1500_Yes]      | t(4)=6.08   | p< 0.0037 | t(4)=26.71        | p< 0.0001 | t(4)=11.94         | p< 0.0003 | t(4)=0.30          | p< 0.7798 |
| [PSM_0_No]vs[PSM_3200_No]       | t(4)=0.04   | p< 0.9678 | t(4)=1.45         | p< 0.2196 | t(4)=3.83          | p< 0.0186 | t(4)=1.64          | p< 0.1755 |
| [PSM_0_No]vs[PSM_3200_Yes]      | t(4)=10.30  | p< 0.0005 | t(4)=15.37        | p< 0.0001 | t(4)=61.00         | p< 0.0001 | t(4)=0.32          | p< 0.7637 |
| [PSM_0_No]vs[PSM_12000_No]      | t(4)=0.02   | p< 0.9861 | t(4)=2.55         | p< 0.0636 | t(4)=5.53          | p< 0.0052 | t(4)=0.74          | p< 0.5000 |
| [PSM_0_No]vs[PSM_12000_Yes]     | t(4)=4.34   | p< 0.0123 | t(4)=16.80        | p< 0.0001 | t(4)=19.82         | p< 0.0001 | t(4)=0.07          | p< 0.9511 |
| [PSM_0_No]vs[HSM_0_No]          | t(4)=0.00   | p< 1.0000 | t(4)=0.00         | p< 1.0000 | t(4)=0.00          | p< 1.0000 | t(4)=0.00          | p< 1.0000 |
| [PSM_0_No]vs[HSM_0_Yes]         | t(4)=2.62   | p< 0.0589 | t(4)=6.29         | p< 0.0033 | t(4)=2.47          | p< 0.0689 | t(4)=0.41          | p< 0.7042 |
| [PSM_0_No]vs[HSM_1500_No]       | t(4)=10.45  | p< 0.0005 | t(4)=1.97         | p< 0.1196 | t(4)=6.84          | p< 0.0024 | t(4)=2.85          | p< 0.0462 |
| [PSM_0_No]vs[HSM_1500_Yes]      | t(4)=39.29  | p< 0.0001 | t(4)=22.25        | p< 0.0001 | t(4)=4.07          | p< 0.0152 | t(4)=15.13         | p< 0.0001 |
| [PSM_0_No]vs[HSM_3200_No]       | t(4)=18.31  | p< 0.0001 | t(4)=3.47         | p< 0.0256 | t(4)=3.91          | p< 0.0173 | t(4)=8.13          | p< 0.0012 |
| [PSM_0_No]vs[HSM_3200_Yes]      | t(4)=295.00 | p< 0.0001 | t(4)=108.48       | p< 0.0001 | t(4)=6.49          | p< 0.0029 | t(4)=15.30         | p< 0.0001 |
| [PSM_0_No]vs[HSM_12000_No]      | t(4)=50.47  | p< 0.0001 | t(4)=11.43        | p< 0.0003 | t(4)=3.88          | p< 0.0179 | t(4)=17.05         | p< 0.0001 |
| [PSM_0_No]vs[HSM_12000_Yes]     | t(4)=169.74 | p< 0.0001 | t(4)=108.10       | p< 0.0001 | t(4)=7.53          | p< 0.0017 | t(4)=138.50        | p< 0.0001 |
| [PSM_0_Yes]vs[PSM_1500_No]      | t(4)=1.53   | p< 0.2019 | t(4)=3.34         | p< 0.0288 | t(4)=1.30          | p< 0.2647 | t(4)=0.46          | p< 0.6714 |
| [PSM_0_Yes]vs[PSM_1500_Yes]     | t(4)=0.17   | p< 0.8734 | t(4)=0.38         | p< 0.7225 | t(4)=0.85          | p< 0.4434 | t(4)=0.10          | p< 0.9247 |
| [PSM_0_Yes]vs[PSM_3200_No]      | t(4)=1.45   | p< 0.2204 | t(4)=4.80         | p< 0.0086 | t(4)=0.40          | p< 0.7085 | t(4)=1.16          | p< 0.3124 |
| [PSM_0_Yes]vs[PSM_3200_Yes]     | t(4)=0.12   | p< 0.9099 | t(4)=1.18         | p< 0.3018 | t(4)=0.60          | p< 0.5782 | t(4)=0.09          | p< 0.9353 |
| [PSM_0_Yes]vs[PSM_12000_No]     | t(4)=1.32   | p< 0.2560 | t(4)=2.36         | p< 0.0776 | t(4)=0.72          | p< 0.5100 | t(4)=0.80          | p< 0.4698 |
| [PSM_0_Yes]vs[PSM_12000_Yes]    | t(4)=0.74   | p< 0.4977 | t(4)=1.61         | p< 0.1828 | t(4)=0.80          | p< 0.4706 | t(4)=0.17          | p< 0.8709 |
| [PSM_0_Yes]vs[HSM_0_No]         | t(4)=2.62   | p< 0.0589 | t(4)=6.29         | p< 0.0033 | t(4)=2.47          | p< 0.0689 | t(4)=0.41          | p< 0.7042 |
| [PSM_0_Yes]vs[HSM_0_Yes]        | t(4)=0.00   | p< 1.0000 | t(4)=0.00         | p< 1.0000 | t(4)=0.00          | p< 1.0000 | t(4)=0.00          | p< 1.0000 |
| [PSM_0_Yes]vs[HSM_1500_No]      | t(4)=1.98   | p< 0.1184 | t(4)=2.61         | p< 0.0591 | t(4)=0.75          | p< 0.4954 | t(4)=1.43          | p< 0.2266 |
| [PSM_0_Yes]vs[HSM_1500_Yes]     | t(4)=5.82   | p< 0.0043 | t(4)=2.99         | p< 0.0404 | t(4)=1.21          | p< 0.2932 | t(4)=3.17          | p< 0.0338 |
| [PSM_0_Yes]vs[HSM_3200_No]      | t(4)=3.37   | p< 0.0281 | t(4)=1.06         | p< 0.3475 | t(4)=0.09          | p< 0.9354 | t(4)=2.88          | p< 0.0448 |
| [PSM_0_Yes]vs[HSM_3200_Yes]     | t(4)=6.57   | p< 0.0028 | t(4)=3.95         | p< 0.0169 | t(4)=1.95          | p< 0.1230 | t(4)=3.92          | p< 0.0173 |
| [PSM_0_Yes]vs[HSM_12000_No]     | t(4)=6.05   | p< 0.0038 | t(4)=1.83         | p< 0.1415 | t(4)=1.44          | p< 0.2242 | t(4)=4.59          | p< 0.0101 |
| [PSM_0_Yes]vs[HSM_12000_Yes]    | t(4)=6.54   | p< 0.0028 | t(4)=3.91         | p< 0.0174 | t(4)=2.67          | p< 0.0559 | t(4)=4.97          | p< 0.0077 |
| [PSM_1500_No]vs[PSM_1500_Yes]   | t(4)=1.82   | p< 0.1424 | t(4)=3.97         | p< 0.0166 | t(4)=5.25          | p< 0.0063 | t(4)=0.36          | p< 0.7387 |
| [PSM_1500_No]vs[PSM_3200_No]    | t(4)=0.18   | p< 0.8660 | t(4)=0.55         | p< 0.6129 | t(4)=1.47          | p< 0.2153 | t(4)=1.26          | p< 0.2753 |
| [PSM_1500_No]vs[PSM_3200_Yes]   | t(4)=1.83   | p< 0.1411 | t(4)=4.35         | p< 0.0121 | t(4)=6.04          | p< 0.0038 | t(4)=0.38          | p< 0.7240 |
| [PSM_1500_No]vs[PSM_12000_No]   | t(4)=0.16   | p< 0.8819 | t(4)=1.65         | p< 0.1739 | t(4)=1.35          | p< 0.2471 | t(4)=0.61          | p< 0.5772 |
| [PSM_1500_No]vs[PSM_12000_Yes]  | t(4)=2.11   | p< 0.1021 | t(4)=4.60         | p< 0.0100 | t(4)=5.99          | p< 0.0039 | t(4)=0.11          | p< 0.9147 |
| [PSM_1500_No]vs[HSM_0_No]       | t(4)=0.21   | p< 0.8468 | t(4)=0.42         | p< 0.6951 | t(4)=3.45          | p< 0.0261 | t(4)=0.22          | p< 0.8396 |
| [PSM_1500_No]vs[HSM_0_Yes]      | t(4)=1.53   | p< 0.2019 | t(4)=3.34         | p< 0.0288 | t(4)=1.30          | p< 0.2647 | t(4)=0.46          | p< 0.6714 |
| [PSM_1500_No]vs[HSM_1500_No]    | t(4)=2.98   | p< 0.0408 | t(4)=1.40         | p< 0.2342 | t(4)=3.78          | p< 0.0195 | t(4)=2.68          | p< 0.0552 |
| [PSM_1500_No]vs[HSM_1500_Yes]   | t(4)=5.31   | p< 0.0060 | t(4)=5.40         | p< 0.0057 | t(4)=2.86          | p< 0.0458 | t(4)=8.64          | p< 0.0010 |
| [PSM_1500_No]vs[HSM_3200_No]    | t(4)=3.84   | p< 0.0185 | t(4)=2.34         | p< 0.0796 | t(4)=1.84          | p< 0.1399 | t(4)=6.41          | p< 0.0030 |
| [PSM_1500_No]vs[HSM_3200_Yes]   | t(4)=5.73   | p< 0.0046 | t(4)=5.91         | p< 0.0041 | t(4)=4.62          | p< 0.0098 | t(4)=9.83          | p< 0.0006 |
| [PSM_1500_No]vs[HSM_12000_No]   | t(4)=5.44   | p< 0.0055 | t(4)=4.66         | p< 0.0096 | t(4)=2.87          | p< 0.0454 | t(4)=11.20         | p< 0.0004 |
| [PSM_1500_No]vs[HSM_12000_Yes]  | t(4)=5.71   | p< 0.0047 | t(4)=5.89         | p< 0.0041 | t(4)=5.64          | p< 0.0049 | t(4)=15.08         | p< 0.0001 |
| [PSM_1500_Yes]vs[PSM_3200_No]   | t(4)=1.80   | p< 0.1458 | t(4)=6.05         | p< 0.0038 | t(4)=2.24          | p< 0.0887 | t(4)=1.11          | p< 0.3284 |
| [PSM_1500_Yes]vs[PSM_3200_Yes]  | t(4)=0.12   | p< 0.9125 | t(4)=1.67         | p< 0.1693 | t(4)=0.97          | p< 0.3860 | t(4)=0.02          | p< 0.9886 |
| [PSM_1500_Yes]vs[PSM_12000_No]  | t(4)=1.59   | p< 0.1862 | t(4)=3.47         | p< 0.0256 | t(4)=3.92          | p< 0.0173 | t(4)=0.73          | p< 0.5047 |
| [PSM_1500_Yes]vs[PSM_12000_Yes] | t(4)=0.82   | p< 0.4566 | t(4)=2.57         | p< 0.0619 | t(4)=0.23          | p< 0.8278 | t(4)=0.10          | p< 0.9250 |
| [PSM_1500_Yes]vs[HSM_0_No]      | t(4)=6.08   | p< 0.0037 | t(4)=26.71        | p< 0.0001 | t(4)=11.94         | p< 0.0003 | t(4)=0.30          | p< 0.7798 |
| [PSM_1500_Yes]vs[HSM_0_Yes]     | t(4)=0.17   | p< 0.8734 | t(4)=0.38         | p< 0.7225 | t(4)=0.85          | p< 0.4434 | t(4)=0.10          | p< 0.9247 |
| [PSM_1500_Yes]vs[HSM_1500_No]   | t(4)=3.07   | p< 0.0375 | t(4)=3.71         | p< 0.0207 | t(4)=0.09          | p< 0.9324 | t(4)=1.62          | p< 0.1795 |
| [PSM_1500_Yes]vs[HSM_1500_Yes]  | t(4)=11.30  | p< 0.0003 | t(4)=5.76         | p< 0.0045 | t(4)=0.80          | p< 0.4687 | t(4)=3.61          | p< 0.0225 |
| [PSM_1500_Yes]vs[HSM_3200_No]   | t(4)=5.89   | p< 0.0041 | t(4)=1.61         | p< 0.1826 | t(4)=1.47          | p< 0.2147 | t(4)=3.25          | p< 0.0313 |
| [PSM_1500_Yes]vs[HSM_3200_Yes]  | t(4)=13.82  | p< 0.0002 | t(4)=13.36        | p< 0.0002 | t(4)=1.93          | p< 0.1251 | t(4)=4.41          | p< 0.0116 |
| [PSM_1500_Yes]vs[HSM_12000_No]  | t(4)=12.08  | p< 0.0003 | t(4)=2.39         | p< 0.0748 | t(4)=1.11          | p< 0.3311 | t(4)=5.14          | p< 0.0068 |
| [PSM_1500_Yes]vs[HSM_12000_Yes] | t(4)=13.69  | p< 0.0002 | t(4)=13.23        | p< 0.0002 | t(4)=3.02          | p< 0.0391 | t(4)=5.61          | p< 0.0049 |
| [PSM_3200_No]vs[PSM_3200_Yes]   | t(4)=1.82   | p< 0.1432 | t(4)=6.42         | p< 0.0030 | t(4)=2.00          | p< 0.1158 | t(4)=1.13          | p< 0.3201 |
| [PSM_3200_No]vs[PSM_12000_No]   | t(4)=0.01   | p< 0.9895 | t(4)=2.70         | p< 0.0539 | t(4)=0.50          | p< 0.6464 | t(4)=0.24          | p< 0.8218 |
| [PSM_3200_No]vs[PSM_12000_Yes]  | t(4)=2.11   | p< 0.1024 | t(4)=6.75         | p< 0.0025 | t(4)=2.28          | p< 0.0844 | t(4)=0.64          | p< 0.5597 |
| [PSM_3200_No]vs[HSM_0_No]       | t(4)=0.04   | p< 0.9678 | t(4)=1.45         | p< 0.2196 | t(4)=3.83          | p< 0.0186 | t(4)=1.64          | p< 0.1755 |
| [PSM_3200_No]vs[HSM_0_Yes]      | t(4)=1.45   | p< 0.2204 | t(4)=4.80         | p< 0.0086 | t(4)=0.40          | p< 0.7085 | t(4)=1.16          | p< 0.3124 |
| [PSM_3200_No]vs[HSM_1500_No]    | t(4)=3.12   | p< 0.0357 | t(4)=2.37         | p< 0.0765 | t(4)=1.80          | p< 0.1463 | t(4)=3.28          | p< 0.0306 |



### **Analysis summary**

#### **A/PR/8/34(H1N1)**

ANOVA: Design 3 Between Subject Factors

mucus F(1,32) = 129 p<0.000001 SS=3.06 MSe=0.02  
CONC F(3,32) = 17.9 p<0.000001 SS=1.28 MSe=0.02  
INHIBITOR F(1,32) = 43.0 p<0.000001 SS=1.02 MSe=0.02  
mucus\*CONC F(3,32) = 15.0 p<0.000003 SS=1.07 MSe=0.02  
mucus\*INHIBITOR F(1,32) = 0.430 p<0.516487 SS=0.01 MSe=0.02  
CONC\*INHIBITOR F(3,32) = 0.542 p<0.657188 SS=0.04 MSe=0.02  
mucus\*CONC\*INHIBITOR F(3,32) = 1.11 p<0.358579 SS=0.08 MSe=0.02

#### **A/SD/1/2009(SOIV)**

ANOVA: Design 3 Between Subject Factors

mucus F(1,32) = 40.9 p<0.000001 SS=0.87 MSe=0.02  
concentration F(3,32) = 15.7 p<0.000002 SS=1.00 MSe=0.02  
inhibitor F(1,32) = 189 p<0.000001 SS=4.02 MSe=0.02  
mucus\*concentration F(3,32) = 5.12 p<0.005272 SS=0.33 MSe=0.02  
mucus\*inhibitor F(1,32) = 4.69 p<0.037968 SS=0.10 MSe=0.02  
concentration\*inhibitor F(3,32) = 4.52 p<0.009392 SS=0.29 MSe=0.02  
mucus\*concentration\*inhibitor F(3,32) = 1.40 p<0.259810 SS=0.09 MSe=0.02

#### **A/SD/17/2008(H1N1)**

ANOVA: Design 3 Between Subject Factors

mucus F(1,32) = 17.0 p<0.000251 SS=0.39 MSe=0.02  
concentration F(3,32) = 11.6 p<0.000026 SS=0.79 MSe=0.02  
inhibitor F(1,32) = 29.8 p<0.000005 SS=0.68 MSe=0.02  
mucus\*concentration F(3,32) = 3.09 p<0.040822 SS=0.21 MSe=0.02  
mucus\*inhibitor F(1,32) = 0.013 p<0.909212 SS=0.01 MSe=0.02  
concentration\*inhibitor F(3,32) = 0.551 p<0.651421 SS=0.04 MSe=0.02  
mucus\*concentration\*inhibitor F(3,32) = 0.805 p<0.500577 SS=0.05 MSe=0.02

#### **A/Aichi/2/68(H3N2)**

ANOVA: Design 3 Between Subject Factors

Mucus F(1,32) = 80.0 p<0.000001 SS=3.59 MSe=0.04  
Concentration F(3,32) = 7.39 p<0.000677 SS=1.00 MSe=0.04  
Inhibitor F(1,32) = 3.98 p<0.054496 SS=0.18 MSe=0.04  
Mucus\*Concentration F(3,32) = 11.3 p<0.000032 SS=1.53 MSe=0.04  
Mucus\*Inhibitor F(1,32) = 0.008 p<0.929982 SS=0.01 MSe=0.04  
Concentration\*Inhibitor F(3,32) = 0.208 p<0.890387 SS=0.03 MSe=0.04  
Mucus\*Concentration\*Inhibitor F(3,32) = 0.266 p<0.849203 SS=0.04 MSe=0.04
